# Supplementary material for: Construction of an SNP-based high-density linkage map for flax (Linum usitatissimum L.) using specific length amplified fragment sequencing (SLAF-seq) technology
Source: PubMed Central journal article supplement (PMC5739455; doi:10.1371/journal.pone.0189785), 2017-12-21

LG 1

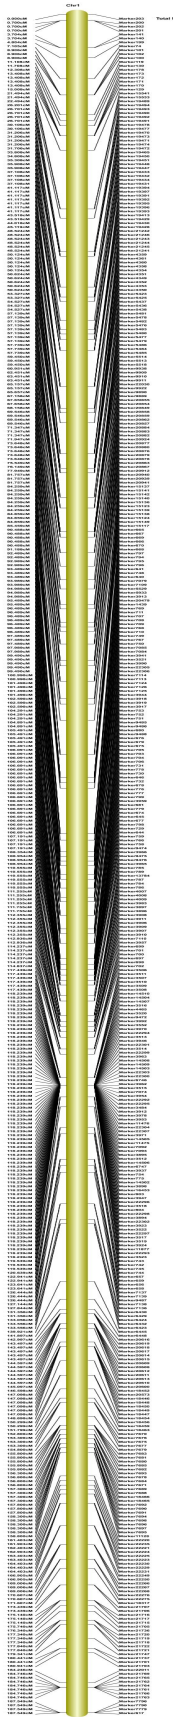

LG 2

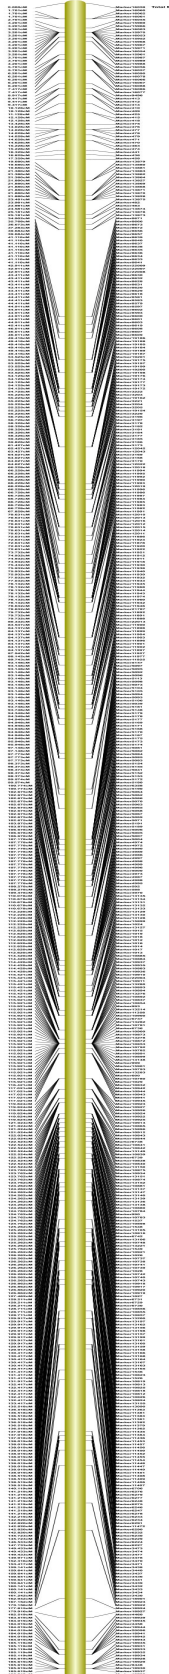

LG 3

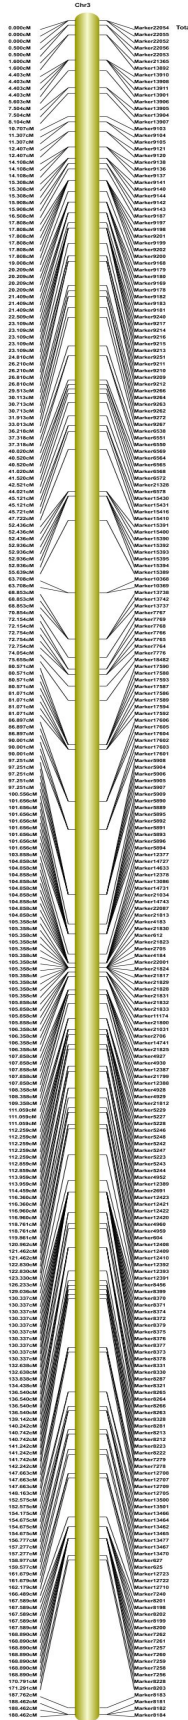

LG 4

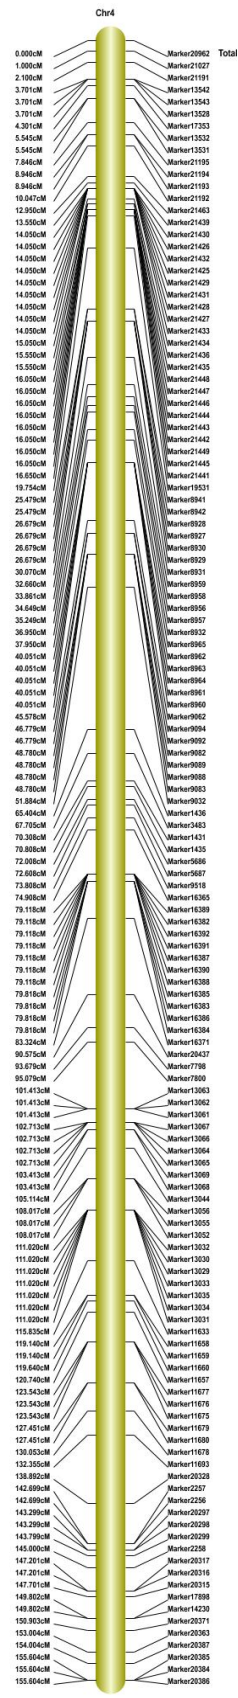

| Marker Name | Distance (cM) |
|-------------|---------------|
| Marker2092  | 0.000cM       |
| Marker2107  | 1.000cM       |
| Marker2191  | 2.100cM       |
| Marker2342  | 3.701cM       |
| Marker2543  | 3.701cM       |
| Marker2358  | 4.301cM       |
| Marker17353 | 5.945cM       |
| Marker2332  | 5.945cM       |
| Marker2521  | 7.646cM       |
| Marker2195  | 8.946cM       |
| Marker2193  | 10.247cM      |
| Marker2192  | 12.950cM      |
| Marker2463  | 13.550cM      |
| Marker2439  | 14.950cM      |
| Marker2426  | 14.950cM      |
| Marker2432  | 14.950cM      |
| Marker2425  | 14.950cM      |
| Marker2429  | 14.950cM      |
| Marker2421  | 14.950cM      |
| Marker2428  | 14.950cM      |
| Marker2427  | 14.950cM      |
| Marker2434  | 15.550cM      |
| Marker2438  | 15.550cM      |
| Marker2435  | 16.950cM      |
| Marker2447  | 16.950cM      |
| Marker2446  | 16.950cM      |
| Marker2444  | 16.950cM      |
| Marker2443  | 16.950cM      |
| Marker2442  | 16.950cM      |
| Marker2448  | 16.950cM      |
| Marker2445  | 16.950cM      |
| Marker2441  | 16.950cM      |
| Marker2423  | 18.754cM      |
| Marker8942  | 25.479cM      |
| Marker8941  | 25.479cM      |
| Marker8928  | 26.679cM      |
| Marker8927  | 26.679cM      |
| Marker8930  | 26.679cM      |
| Marker8929  | 26.679cM      |
| Marker8931  | 30.079cM      |
| Marker8939  | 32.566cM      |
| Marker8938  | 33.361cM      |
| Marker8956  | 34.649cM      |
| Marker8957  | 34.649cM      |
| Marker8958  | 36.950cM      |
| Marker8965  | 37.950cM      |
| Marker8962  | 40.051cM      |
| Marker8963  | 40.051cM      |
| Marker8964  | 40.051cM      |
| Marker8961  | 40.051cM      |
| Marker8960  | 40.051cM      |
| Marker9062  | 46.578cM      |
| Marker9064  | 46.778cM      |
| Marker9092  | 46.778cM      |
| Marker9082  | 48.780cM      |
| Marker9089  | 48.780cM      |
| Marker9085  | 48.780cM      |
| Marker9083  | 48.780cM      |
| Marker9032  | 51.884cM      |
| Marker1436  | 65.494cM      |
| Marker1463  | 67.705cM      |
| Marker1431  | 70.308cM      |
| Marker1435  | 70.808cM      |
| Marker9086  | 72.008cM      |
| Marker9087  | 72.008cM      |
| Marker9118  | 73.808cM      |
| Marker9116  | 74.908cM      |
| Marker1636  | 78.118cM      |
| Marker1639  | 78.118cM      |
| Marker1632  | 79.118cM      |
| Marker1630  | 79.118cM      |
| Marker1637  | 79.118cM      |
| Marker1639  | 79.118cM      |
| Marker1638  | 79.118cM      |
| Marker1635  | 79.118cM      |
| Marker1633  | 79.818cM      |
| Marker1636  | 79.818cM      |
| Marker1634  | 79.818cM      |
| Marker16371 | 83.324cM      |
| Marker2047  | 90.575cM      |
| Marker1796  | 93.075cM      |
| Marker2080  | 93.075cM      |
| Marker1363  | 101.413cM     |
| Marker1362  | 101.413cM     |
| Marker1361  | 101.413cM     |
| Marker1367  | 102.713cM     |
| Marker1366  | 102.713cM     |
| Marker1364  | 102.713cM     |
| Marker1365  | 102.713cM     |
| Marker1368  | 103.413cM     |
| Marker1368  | 103.413cM     |
| Marker1364  | 105.114cM     |
| Marker1366  | 106.017cM     |
| Marker1365  | 106.017cM     |
| Marker1362  | 108.017cM     |
| Marker1362  | 111.620cM     |
| Marker1369  | 111.620cM     |
| Marker1369  | 111.620cM     |
| Marker1363  | 111.620cM     |
| Marker1363  | 111.620cM     |
| Marker1364  | 111.620cM     |
| Marker1361  | 115.835cM     |
| Marker1633  | 119.140cM     |
| Marker1639  | 119.140cM     |
| Marker1669  | 126.740cM     |
| Marker1657  | 126.740cM     |
| Marker1677  | 123.543cM     |
| Marker1675  | 123.543cM     |
| Marker1675  | 123.543cM     |
| Marker1679  | 127.451cM     |
| Marker1680  | 127.451cM     |
| Marker1679  | 133.852cM     |
| Marker1693  | 133.852cM     |
| Marker2028  | 138.882cM     |
| Marker2257  | 142.899cM     |
| Marker226   | 142.899cM     |
| Marker20291 | 143.289cM     |
| Marker20298 | 143.289cM     |
| Marker20299 | 143.289cM     |
| Marker2029  | 145.000cM     |
| Marker20311 | 147.201cM     |
| Marker20316 | 147.201cM     |
| Marker20315 | 147.701cM     |
| Marker1898  | 148.802cM     |
| Marker1429  | 150.903cM     |
| Marker20363 | 153.004cM     |
| Marker20361 | 154.004cM     |
| Marker20365 | 155.804cM     |
| Marker20364 | 155.804cM     |
| Marker20386 | 155.804cM     |

LG 5

LG 6

LG 7

LG 8

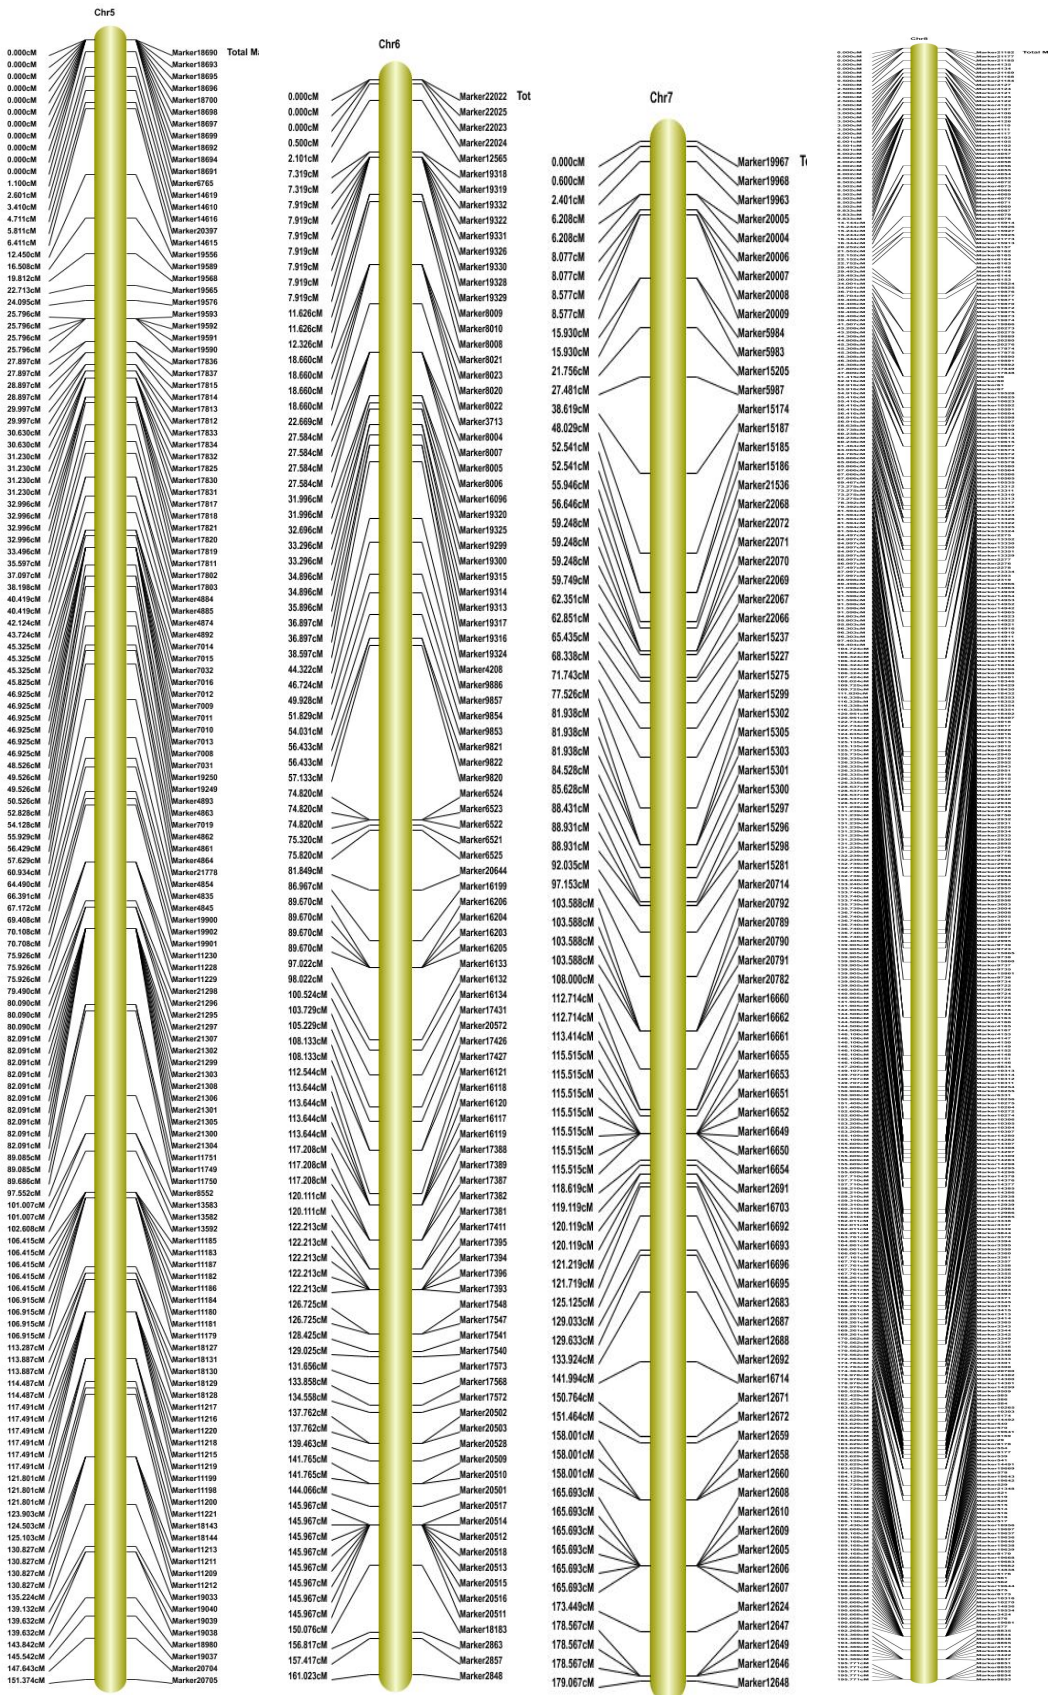



# LG 13

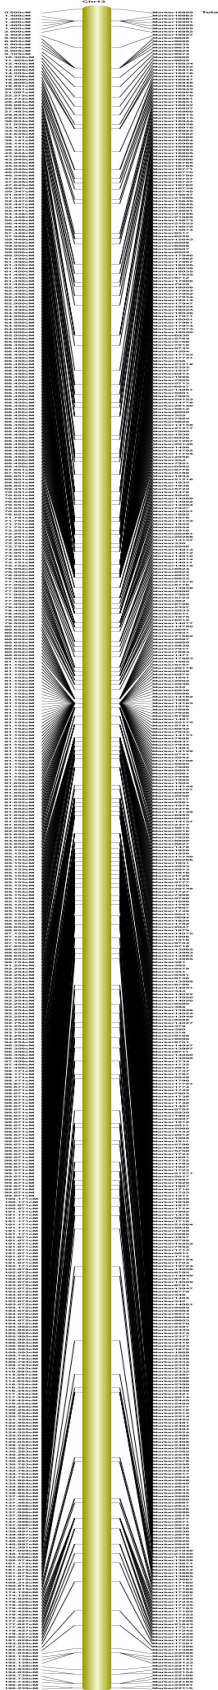

# LG 14

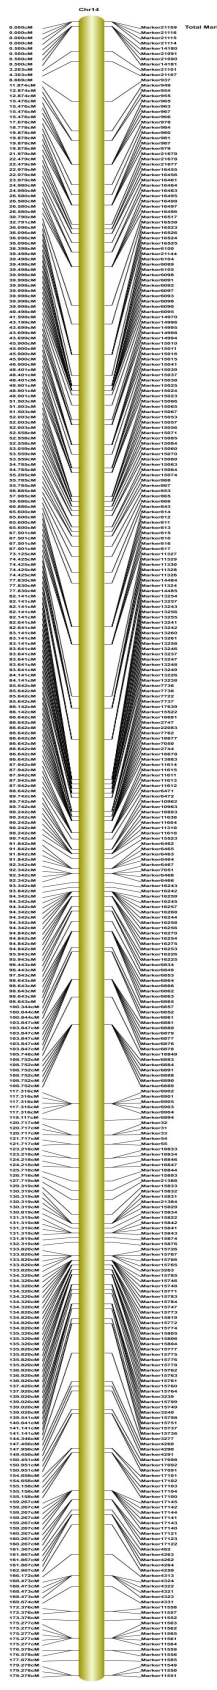

# LG 15

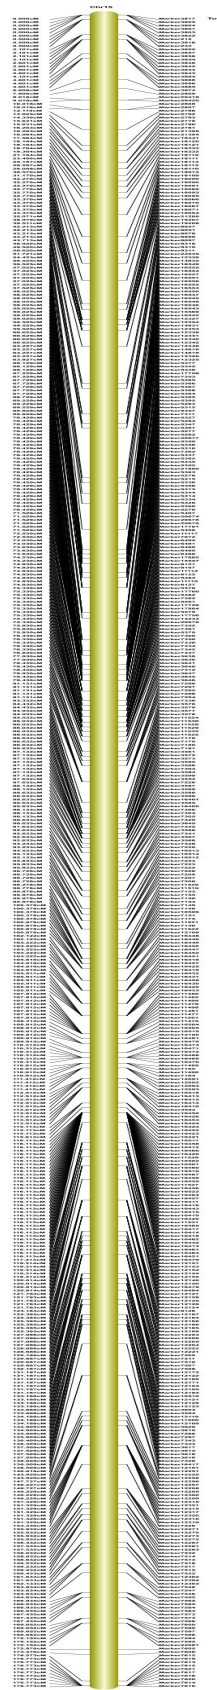

Supplement: pone.0189785.s001.pdf [file pone.0189785.s001.pdf]
